# Supplementary material for: Coalescence and compression in centrifuged emulsions studied with in situ optical microscopy
Source: Royal Society of Chemistry journal article supplement (doi:10.1039/c3sm27850f), 2013-01-01
Supplement: c3sm27850f.pdf [file c3sm27850f.pdf]

## Supplementary Information

### *Calculation of the droplet packing fraction in a monodisperse 2D emulsion*

Figure 4 in the manuscript displays the mean dispersed phase fraction  $\langle\phi\rangle$  as a function of the reduced droplet column height  $H$  for a two-dimensional layer of the emulsion droplets.  $H$  is calculated as  $H = r_{3D}\langle h\rangle\Delta\rho a/\sigma$ , where  $r_{3D}$  is the radius of an undeformed droplet,  $\langle h\rangle$  is the mean column height,  $\Delta\rho$  is the density difference between the two phases,  $a$  is the radial acceleration, and  $\sigma$  is the liquid-liquid interfacial tension.  $\langle\phi\rangle(H)$  can be obtained from the profile  $\phi(H)$ , which can be calculated from (1):

$$H(\phi) = \frac{1}{(\phi\phi_0)^{1/2}} \left[ 1 + \left( \frac{1-\phi_0}{1-\phi} \right)^{1/2} (2\phi - 1) \right] - 2 \quad (1)$$

The mean value  $\langle\phi\rangle(H)$  is then calculated numerically from the curve  $\phi(H)$ :

$$\langle\phi\rangle(H) = \frac{1}{H} \int_0^H \phi(H') dH' \quad (2)$$

### *Calculation of drop-drop coalescence rates*

The frequency of drop-drop coalescence events  $dn_{c,dd}/dt$  in a uniform dense layer of emulsion droplets is given by (2):

$$\frac{dn_{c,dd}}{dt} = \frac{N_d}{2\tau_{dd}} \quad (3)$$

$n_d$  is the number of droplets and  $\tau_{dd}$  is the coalescence time. For non-deformable droplets (i.e. hard spheres), the coalescence time  $\tau_{dd}$  for a droplet pair is given by (3):

$$\tau_{dd} = \frac{3\pi r_d^2 \eta_c}{2F} \ln \left( \frac{h_0}{h_c} \right) \quad (4)$$

In equation 4,  $F$  denotes the interaction force between the droplets.  $h_0$  denotes the initial thickness of the continuous phase film, and  $h_c$  is the critical thickness for rupture of the film. For deformable droplets, the following equation is obtained (3):

$$\tau_{dd} = \frac{3\pi r_d^2 \eta_c F}{16\sigma h_c^2} \quad (5)$$

In equation 5,  $\sigma$  denotes the liquid-liquid interfacial tension. Both equations assume that the interaction force  $F$  bringing the droplets together is constant, and

that there is no barrier against coalescence, such as induced by the presence of surfactants. In that case,  $F$  is equal to the buoyancy force  $F = N_c V_d \Delta \rho a$ .  $N_c$  is the number of droplets in the emulsion column below the coalescing droplet,  $V_d$  is the volume of a droplet,  $\Delta \rho$  the density difference between the continuous and dispersed phase, and  $a$  is the radial acceleration. Droplets at different heights in the emulsion column will thus be subjected to a different buoyancy force. In the simplest approximation, we shall use the average value of  $N_c$  which is  $N_c/2$ . The relation between  $N_c$  and the total number of droplets  $N_d$  is  $N_c = 2\pi r_d^2 N_d / 3wz$ , where  $w$  and  $z$  are the width and depth of the sample chamber, respectively. Inserting this relation and the expressions for  $F$  and  $\tau_{dd}$  for non-deformable droplets into equation 3 yields after integration:

$$n_c = \frac{\Delta \rho a V_d}{9wz\eta_c \ln(h_0/h_c)} \int_0^t (N_d(t'))^2 dt' \quad (6)$$

For deformable droplets, we obtain:

$$n_c = \frac{3wzh_c^2 t}{\pi r_d^7 \Delta \rho a \eta_c} \quad (7)$$

## References

- [1] H.M. Princen. Osmotic pressure of foams and highly concentrated emulsions. 1. theoretical considerations. *Langmuir*, 2:519–524, 1986.
- [2] S. Hartland and S.A.K. Jeelani. Choice of model for predicting the dispersion height in liquid/liquid gravity settlers from batch settling data. *Chem. Eng. Sci.*, 42:1927–1938, 1987.
- [3] A.K. Chesters. The modelling of coalescence processes in fluid-liquid dispersions: A review of current understanding. *Trans. IChemE*, 69A:259–270, 1991.
